# Supplementary material for: Reconstruction of daily gridded snow water equivalent product for the Pan-Arctic region based on a ridge regression machine learning approach
Source: Copernicus journal article supplement (doi:10.5194/essd-2021-344), 2021-11-08
Supplement: Supplementary file [file essd-2021-344-AC1-supplement.pdf]

## Response to Anonymous Referee #1

We greatly appreciate your valuable suggestions and comments. We studied your comments carefully and made substantial revisions accordingly. We hope that our corrections meet the requirements. Our modifications and responses to the reviewers' comments are listed as follows. The reviewers' comments are in blue text, while the authors' responses are in black text. All revisions in the revised manuscript are in red text.

The idea of the paper is to combine various data records on snow water equivalent (SWE) with ridge regression model (RRM) technique. This is an interesting and welcomed approach that possibly provides improved estimates on SWE of the northern hemisphere. However there are some issues that need further consideration and clarification.

**Reply: We greatly appreciate your careful revision of our manuscript.**

1. Apparently, the paper applies point-wise observations on snow cover, not distributed observations from snow courses. Thus the reference data does not directly describe the SWE on the scale of data products. Moreover, the NOAA GHCN data does not include direct measurements on SWE (they are evidently based on snow depth observations at meteorological stations). Thus, the applied reference data may include systematic errors due to inadequate consideration of temporally and spatially varying snow bulk density.

**Reply: Thank you for your very helpful suggestion.**

We fully agree with your opinion that the NOAA GHCN SWE data do have some systematic errors. Therefore, we discarded the NOAA GHCN SWE data. In addition, the Russian snow survey data (RSSD) are also a snow course data type. Therefore, we retrained, tested, and validated the model using new hemispheric-scale snow course observational (HSSC) data and RSSD to generate a new version of the RRM SWE product and re-evaluated the product.

**Most of the contents in the article have been revised due to the replacement of training data, and the detailed changes have been marked in red in the revised manuscript.**

### Abstract:

“We evaluated the accuracy of the RRM SWE product using hemispheric-scale snow course (HSSC) observational data and Russian snow survey data. The MAE, RMSE, R, and  $R^2$  between the RRM SWE products and observed SWEs are 0.21, 25.37 mm, 0.89, and 0.79, respectively. The accuracy of the RRM SWE dataset is improved by 28%, 22%, 37%, 11%, and 11% compared with the original AMSR-E/AMSR2 (SWE), ERA-Interim SWE, Global Land Data Assimilation System (GLDAS) SWE, GlobSnow SWE, and ERA5-land SWE datasets, respectively, and it has a higher spatial resolution.”

“The average MAE and RMSE of the RRM SWE products are 0.22 and 19.92 mm at different altitude intervals and 0.21 and 27.00 mm at different regions, respectively. This method has good stability, it is extremely suitable for the production of snow datasets with large spatial scales, and it can be easily extended to the preparation of other snow datasets.”

### Section 2.4.1:

“Hemispheric-scale snow course (hereinafter referred to as HSSC) observational data are contained in a hemispheric-scale SWE database based on SWE observational datasets from the former Soviet

Union/Russia (FSU), Finland, and Canada developed by Pulliainen et al (Pulliainen et al., 2020; Bronnimann et al., 2018; Brown et al., 2019). This dataset is from the website of the Finnish Meteorological Institute (FMI) ([https://www.globsnow.info/swe/archive\\_v3.0/auxiliary\\_data/](https://www.globsnow.info/swe/archive_v3.0/auxiliary_data/)). The dataset provides data from 2687 distributed regional snow course observations and contains 343,241 SWE observational data points from 1979 to 2018. The dataset is a manually sampled transect, which can effectively solve the problem of spatial scale uncertainty of SWE observational data.”

## References

- Pulliainen, J., Luoju, K., Derksen, C., Mudryk, L., Lemmetyinen, J., Salminen, M., Ikonen, J., Takala, M., Cohen, J., Smolander, T., and Norberg, J.: Patterns and trends of Northern Hemisphere snow mass from 1980 to 2018 (vol 41, pg 861, 2020), *Nature*, 582, E18-E18, 10.1038/s41586-020-2416-4, 2020.
- Bronnimann, S., Allan, R., Atkinson, C., Buizza, R., Bulygina, O., Dahlgren, P., Dee, D., Dunn, R., Gomes, P., John, V. O., Jourdain, S., Haimberger, L., Hersbach, H., Kennedy, J., Poli, P., Pulliainen, J., Rayner, N., Saunders, R., Schulz, J., Sterin, A., Stickler, A., Titchner, H., Valente, M. A., Ventura, C., and Wilkinson, C.: Observations for Reanalyses, *Bulletin of the American Meteorological Society*, 99, 1851-1866, 10.1175/Bams-D-17-0229.1, 2018.
- Brown, R. D., Fang, B., and Mudryk, L.: Update of Canadian historical snow survey data and analysis of snow water equivalent trends, 1967–2016, *Atmosphere-Ocean*, 57, 149-156, 2019.

## Section 3.1:

According to the verification results in Fig. 3 and Table 2, the RRM SWE data have the best overall accuracy, and the MAE, RMSE, R, and R<sup>2</sup> between the observed SWEs are 0.21, 25.37 mm, 0.89, and 0.79, respectively. The overall accuracy of the GlobSnow SWE and ERA5-land SWE products is higher than that of other SWE products. The overall deviation of the ERA5-land SWE products is the smallest except for the RRM SWE data, with MAE and RMSE values of 0.32 and 37.02 mm, respectively. The correlation between the ERA5-land SWE and observed SWE is the highest, except for the RRM SWE data, with R and R<sup>2</sup> values of 0.84 and 0.71, respectively. Although the overall deviation between the GlobSnow SWE dataset and the measured SWE is small, its correlation with the measured value is low. The overall deviation between the ERA5-land SWE dataset and the measured SWE is higher than that of the GlobSnow SWE dataset, but its estimation accuracy for the high-value region of the SWE is low.

The MAE ranking order is RRM SWE < GlobSnow SWE = ERA5-land SWE < ERA-Interim SWE < multisource data average SWE < AMSR-E/AMSR2 SWE < GLDAS SWE.

The RMSE ranking order is RRM SWE < ERA5-land SWE < GlobSnow SWE < ERA-Interim SWE < multisource data average SWE < AMSR-E/AMSR2 SWE < GLDAS SWE.

The R ranking order is RRM SWE > ERA5-land SWE > GlobSnow SWE > ERA-Interim SWE > GLDAS SWE > multisource data average SWE > AMSR-E/AMSR2 SWE.

The R<sup>2</sup> ranking order is RRM SWE > ERA5-land SWE > GlobSnow SWE > ERA-Interim SWE > GLDAS SWE > multisource data average SWE > AMSR-E/AMSR2 SWE.

Compared with the ERA-Interim SWE, AMSR-E/AMSR2 SWE, GLDAS SWE, GlobSnow SWE,

ERA5-land SWE, and multisource data average SWE, the MAE of the RRM SWE and observed SWE is reduced by 0.22, 0.28, 0.37, 0.11, 0.11 and 0.23, respectively. The RMSE of the RRM SWE and observed SWE is reduced by 21.44 mm, 27.02 mm, 39.88 mm, 15.62 mm, 11.65 mm, and 26.63 mm, respectively. The correlation coefficient of the RRM SWE and observed SWE is improved by 0.20, 0.42, 0.37, 0.19, 0.05, and 0.38, respectively. The coefficient of determination of the RRM SWE and observed SWE is improved by 0.31, 0.57, 0.52, 0.30, 0.08, and 0.53, respectively.

**Table 2: Error list for the station data and grid snow water equivalent products.**

| Error type               | MAE  | RMSE (mm) | R    | R <sup>2</sup> |
|--------------------------|------|-----------|------|----------------|
| ERA-Interim              | 0.43 | 46.81     | 0.69 | 0.48           |
| AMSR-E/AMSR2             | 0.49 | 52.39     | 0.47 | 0.22           |
| GLDAS                    | 0.58 | 65.25     | 0.52 | 0.27           |
| GlobSnow                 | 0.32 | 40.99     | 0.70 | 0.49           |
| ERA5-land                | 0.32 | 37.02     | 0.84 | 0.71           |
| Multisource data average | 0.44 | 52.00     | 0.51 | 0.26           |
| RRM SWE                  | 0.21 | 25.37     | 0.89 | 0.79           |

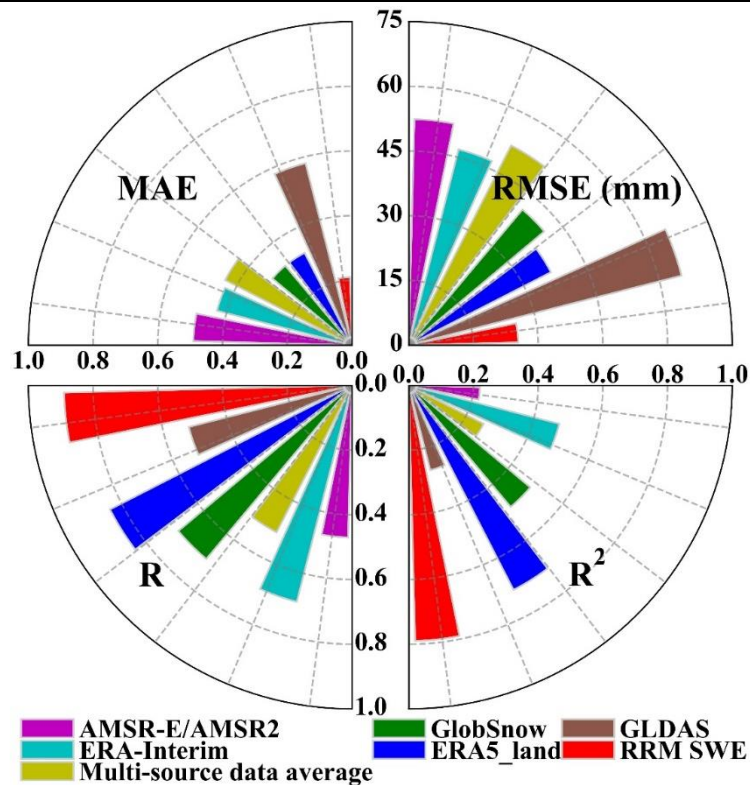

**Figure 3: Accuracy comparison of various SWE products. The upper left sector represents the MAE, the upper right sector represents the RMSE, the lower-left sector represents R, and the lower right sector represents R<sup>2</sup>. The sector axis represents the size of the error, and the color represents different SWE datasets.**

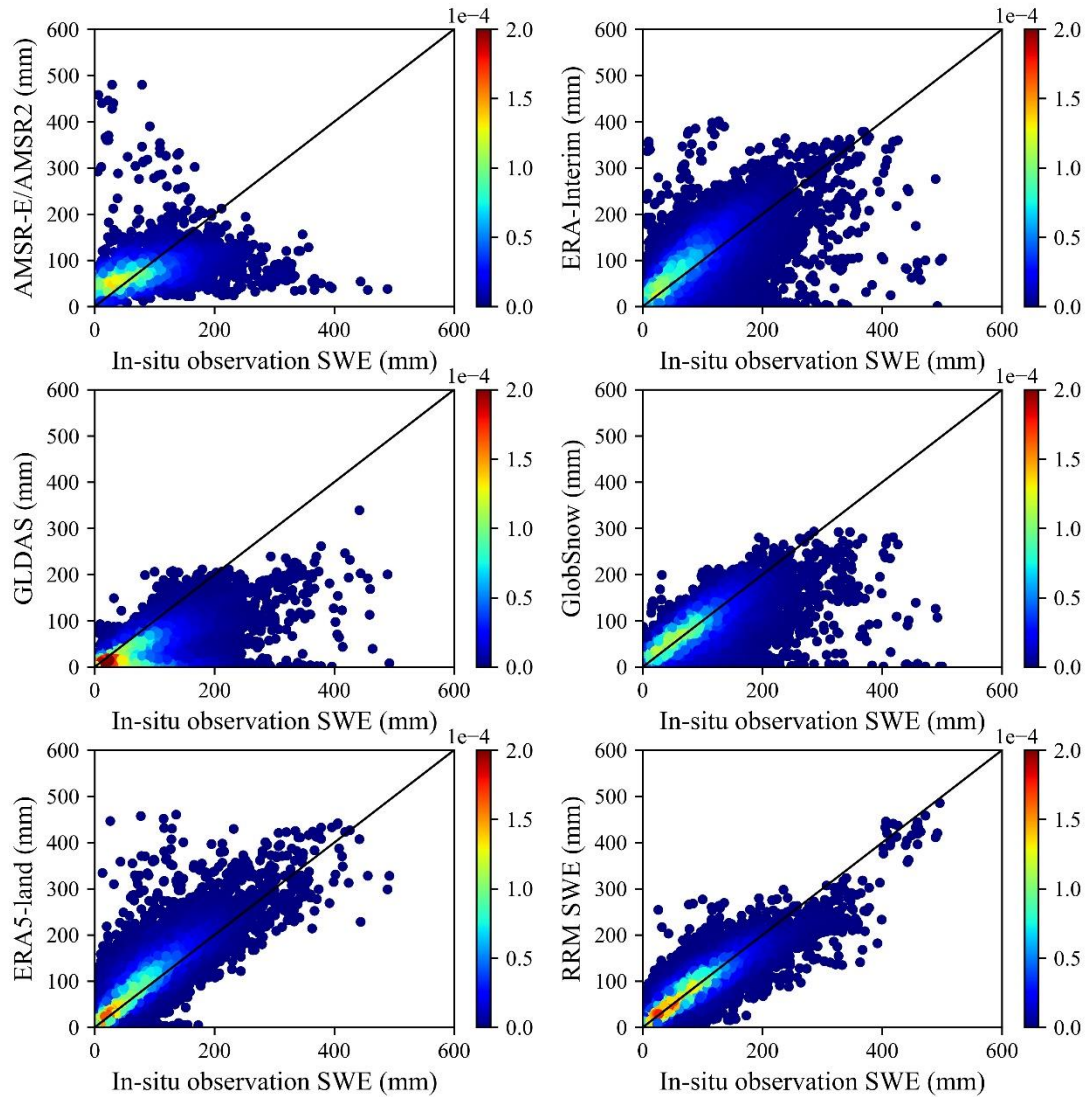

**Figure 4: Error verification density diagram (a total of 38807 sample points were used for verification). The color bar represents the value of kernel density estimation. The closer the high-density area is to the 1:1 line, the higher the verification accuracy of the dataset is at most of the measuring stations.**

### Section 3.2:

The above verification results show that the MAEs between the RRM SWE dataset and measured SWE are 0.16, 0.21, 0.24, 0.23, 0.22, 0.18, 0.23, 0.19, 0.29, 0.27, and 0.18; the RMSEs are 5 mm, 21 mm, 27 mm, 25 mm, 25 mm, 12 mm, 9 mm, 6 mm, 28 mm, 29 mm, and 31 mm; the R values are 0.97, 0.88, 0.88, 0.82, 0.85, 0.96, 0.88, 0.84, 0.90, 0.81, and 0.83; and the  $R^2$  values are 0.95, 0.77, 0.78, 0.67, 0.73, 0.91, 0.77, 0.70, 0.81, 0.66, and 0.70 at altitude gradients of <100 m, 100-200 m, 200-300 m, 300-400 m, 400-500 m, 500-600 m, 600-700 m, 700-800 m, 800-900 m, 900-1000 m and >1000 m, respectively (Fig. 5).

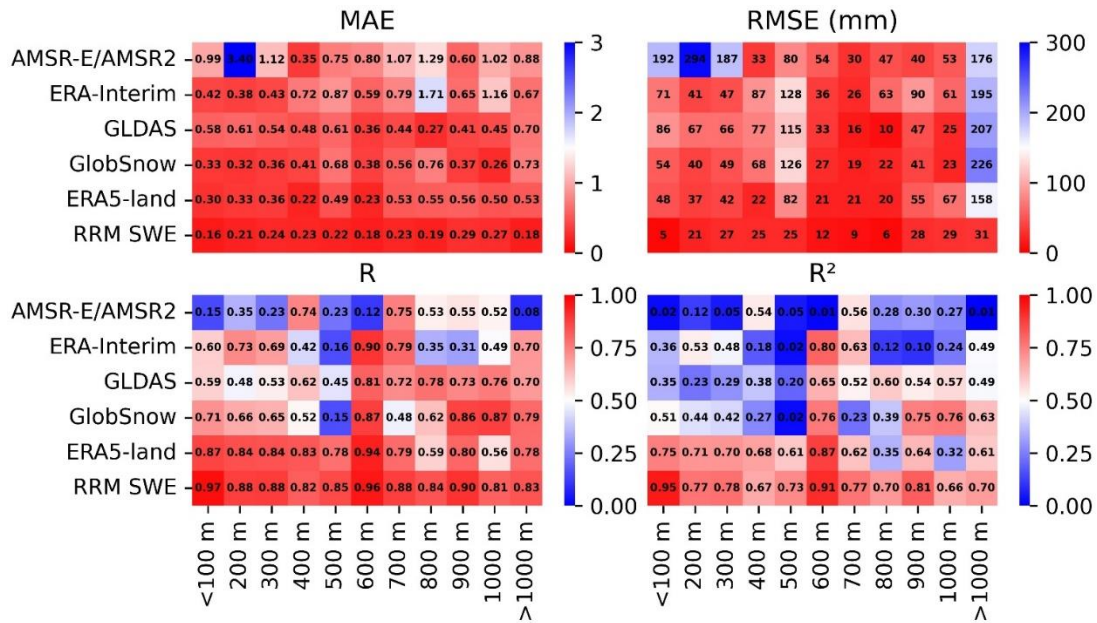

**Figure 5: Comparison of the error between the RRM SWE and AMSR-E/AMSR2 SWE, ERA-Interim SWE, GLDAS SWE, GlobSnow SWE, and ERA5-land SWE at different altitudes (the abscissa represents the altitude gradient, and the ordinate represents different SWE datasets). The color bar indicates the error in each SWE dataset. The closer to red the color is, the higher the accuracy is. MAE: mean absolute error, RMSE: root mean square error, R: Pearson's correlation coefficient, R<sup>2</sup>: coefficient of determination).**

### Section 3.3:

Overall, the annual average relative differences in the RRM SWE data and AMSR2 SWE, ERA-Interim SWE, GLDAS SWE, GlobSnow SWE, and ERA5-land SWE are 37%, 41%, 54%, 25%, and 29%, respectively (Fig. 7).



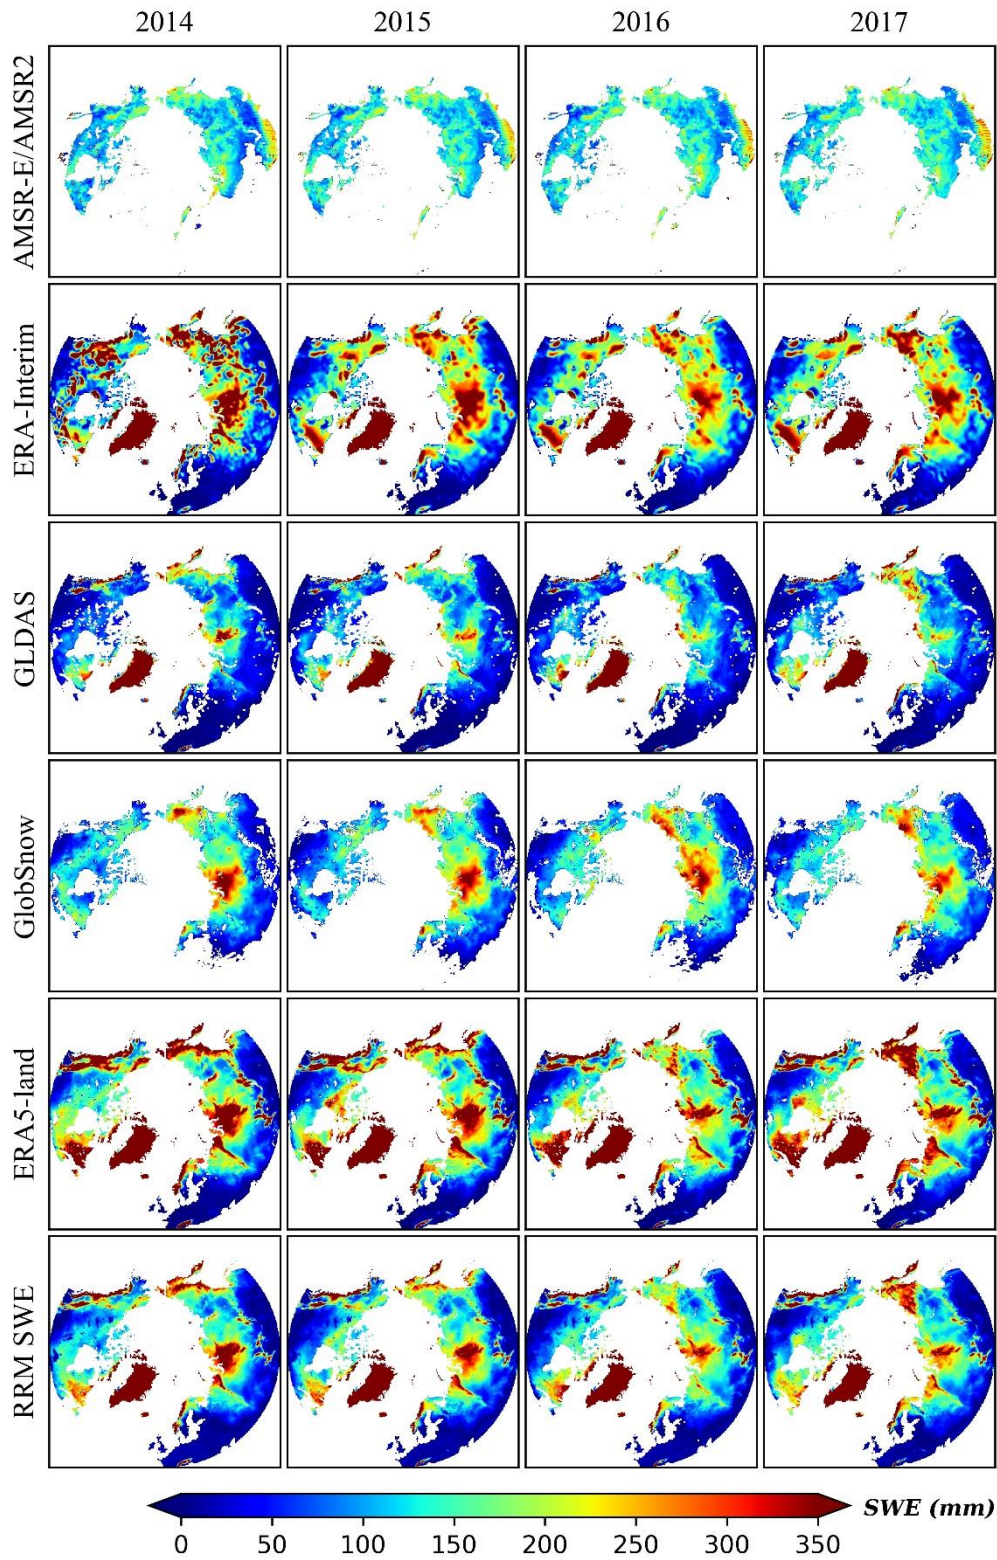

**Figure 6: Comparison of the spatial distribution characteristics between the RRM SWE and AMSR-E/AMSR2 SWE, ERA-Interim SWE, GLDAS SWE, GlobSnow SWE, and ERA5-land SWE (the four columns of images represent the comparison results in 2014, 2015, 2016, and 2017, respectively).**

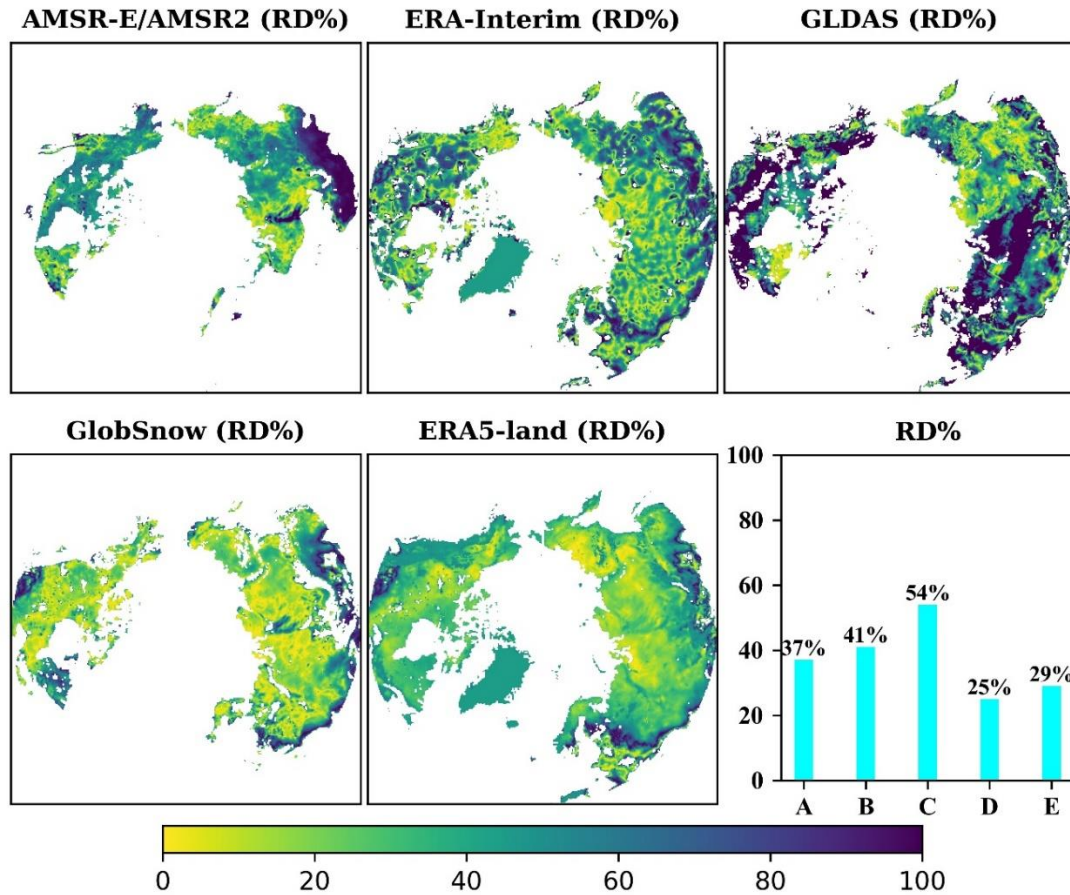

**Figure 7: Temporal and spatial distributions of relative differences (RD%) between the RRM SWE and AMSR-E/AMSR2 SWE, ERA-Interim SWE, GLDAS SWE, GlobSnow SWE, and ERA5-land SWE. Lower-right subgraph: Comparison of annual average relative differences between the RRM SWE and AMSR2 SWE (A), ERA-Interim SWE (B), GLDAS SWE (C), GlobSnow SWE (D), and ERA5-land SWE (E).**

### Section 3.4:

The test values of the AMSR-E/AMSR2 annual average SWE, GlobSnow annual average SWE, ERA5-land annual average SWE, and RRM annual average SWE are -3.26, -2.54, -3.43, and -3.00, respectively, and these four SWEs showed a significantly decreasing trend at the significance test level of 0.05.

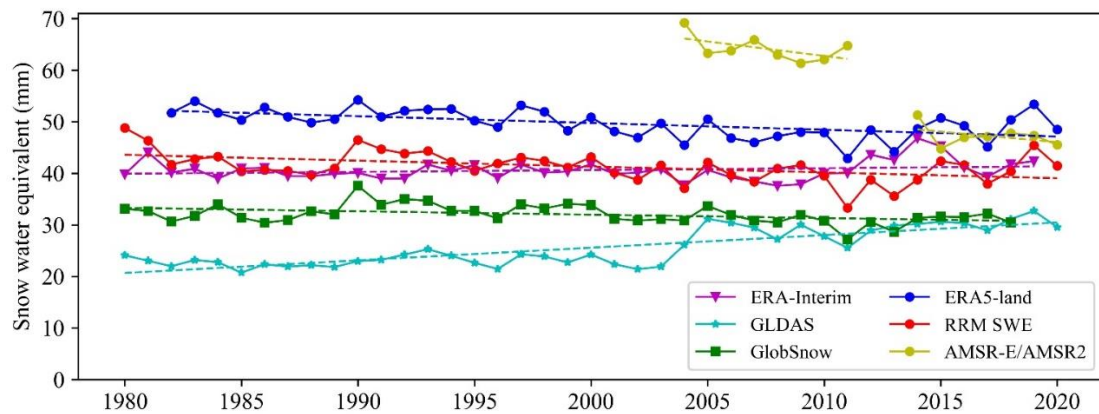

**Figure 8: Annual variation tendency in the AMSR-E/AMSR2 SWE, ERA-Interim SWE, GLDAS SWE, GlobSnow SWE, ERA5-land SWE and RRM SWE products from 1979 to 2019 (the dotted line is the trend line calculated based on the Mann-Kendall method).**

### **Conclusions:**

The accuracy ranking of the SWE dataset verified by the test dataset is described as follows: RRM SWE > ERA5-land SWE > GlobSnow SWE > ERA-Interim SWE > multisource data average SWE > AMSR-E/AMSR2 SWE > GLDAS SWE.

2. The authors should also note a limitation that reanalysis data-based products (that are used here together with observational data-based products) on SWE do not provide model-independent data (results here are not independent on models).

**Reply: The text has been modified to improve clarity.**

Yes, we fully agree with your comments. The reanalyzed data based on the gridded SWE product do suffer from the problem that the data and the model are not independent. The reason for this is that the model estimation is distorted or difficult to estimate accurately due to the existence of an exact correlation or high correlation between the SWE target variable and SWE predictor variables in the training model, namely, the so-called multicollinearity problem. The ridge regression model can solve this multicollinearity problem well, i.e., the independence of models and SWE products based on observational data. The reason why the ridge regression model is selected for RRM SWE product preparation in this study is to solve this problem.

**We have provided detailed supplementary explanations in Section 2.3.**

“The ridge regression model is flexible in the choice of predictor variables and does not require the predictor and target variable to be independent of each other. It can effectively solve the multicollinearity problem of predictor and target variables as well as reduce the impact of this problem on the training model (Duzan and Shariff, 2015; Saleh et al., 2019). Generally, since the reanalysis data based on SWE products cannot make the products and models independent of each other, i.e., they are prone to the multicollinearity problem, which leads to distorted model estimation or difficulty in performing accurate estimations. In contrast, the ridge regression model can successfully solve the multicollinearity problem, i.e., the independence of training products and models. In addition, when integrating multiple SWE products, the accuracy of each SWE dataset is likely to differ. A small change in one of the SWE products involved in the training will cause a significant error in the final calculation results, while the ridge regression model has high accuracy and stability for this "ill-conditioned" SWE data”.

### **References**

Duzan, H. and Shariff, N. S. B. M.: Ridge regression for solving the multicollinearity problem: a review of methods and models, *Journal of Applied Science*, 2015.  
Saleh, A. M. E., Arashi, M., and Kibria, B. G.: *Theory of ridge regression estimation with applications*, John Wiley & Sons 2019.

Detailed comments:

3. Title: Since the study region includes all land areas north of the latitude of 45 degrees, the term



Pan-Arctic is not good.

**Reply: This suggestion has been accepted, and the text has been modified.**

We have modified 'Pan-Arctic' as 'land region above 45° N'.

4.Lines 59-61 and 96-98: The authors should note that a recent investigation (Pulliainen et al. 2020) applied a bias correction to GlobSnow and reanalysis data products to obtain improved estimates on peak annual regional and hemispheric snow mass/SWE. This was done using hemispheric snow course observations.

**Reply: The text has been modified to improve clarity.**

We have noted this very interesting study and used the latest version of the GlobSnow SWE data. In addition, we have added a description of this study to the Introduction and Data sections.

“An effective method was applied in a study by Pulliainen et al (Pulliainen et al., 2020), who applied a bias correction to GlobSnow and reanalysis data products based on SWE snow course measurements to obtain improved estimates on annual peak snow mass and SWE in the Northern Hemisphere.”

Pulliainen, J., Luojus, K., Derksen, C., Mudryk, L., Lemmetyinen, J., Salminen, M., Ikonen, J., Takala, M., Cohen, J., Smolander, T., and Norberg, J.: Patterns and trends of Northern Hemisphere snow mass from 1980 to 2018 (vol 41, pg 861,2020), Nature, 10.1038/s41586-020-2416-4, 2020.

5.Lines 139-166: The method should be explained in more detail. In Eq. (1)  $p$  probably includes as variables the applied five SWE products, but how is the DEM considered? What is the number of samples  $N$  in the training data set? How is the training and testing data set defined/selected?

**Reply: Thank you for your good suggestion. We have added details to the methods section.**

In this study, the DEM was used as an important environmental feature information input to the ridge regression model and was utilized in the model training. The DEM is an auxiliary terrain feature variable in addition to the five SWE prediction feature variables, namely, AMSR-E/AMSR2 SWE, ERA-Interim SWE, GLDAS SWE, GlobSnow SWE, and ERA5-land SWE.

The total number of samples  $N$  in the training dataset was 271651. The sample sizes of the training dataset, validation dataset and test dataset were divided according to the ratio of 7:2:1, where the training, validation, and test set sample numbers were 271651, 77614 and 38807, respectively.

**We have made detailed modifications in Section 2.3.**

“DEM was used as an important environmental feature input to the ridge regression model and was included in the model training. DEM is an auxiliary terrain feature variable in addition to the five SWE prediction feature variables, AMSR-E/AMSR2 SWE, ERA-Interim SWE, GLDAS SWE, GlobSnow SWE, and ERA5-land SWE.”

$$\hat{\beta}^{ridge} = \underset{\beta}{\operatorname{argmin}} \left\{ \sum_{i=1}^N \left( y_i - \beta_0 - \sum_{j=1}^p x_{ij} \beta_j \right)^2 + \lambda \sum_{j=1}^p \beta_j^2 \right\}, \quad (1)$$

where  $\hat{\beta}^{ridge}$  is the extremum solution function of ridge regression and  $p$  is the number of gridded SWE product variables involved in training.  $x_i$  are the prediction feature variables, which contain two

parts, one set contains the main feature variables of the gridded SWE products, and the other part consists of the DEM auxiliary feature variables.  $y_i$  is the observed SWE, and  $\lambda$ ,  $\beta$ ,  $\beta_j$  and  $\beta_0$  are the parameters to be solved.  $1, \dots, N$  is the sample of the training dataset.  $\lambda \sum_{j=1}^p \beta_j^2$  is the penalty function terms. The total number of samples  $N$  in the training dataset is 271651. The sample sizes of the training data set, validation data set and test data set are divided according to the ratio of 7:2:1, where the numbers of training set, validation set and test set samples are 271651, 77614 and 38807, respectively.”

6.Lines 278-279 and 306-308: How is the annual average SWE calculated, mean value across the whole year?

**Reply: This suggestion has been accepted, and the text has been modified accordingly.**

The "annual average SWE" in Lines 278-279 represents the spatially annual average SWE over the land region above 45° N.

The "annual average SWE" of Lines 306-308 represents a further averaging of the annual average SWE across the land region above 45° N over all pixels. Here, the "annual average SWE"  $\overline{SWE}$  can be expressed by the following formula:

$$\overline{SWE} = \frac{\sum_i^N S_i / N}{n}$$

where  $S_i$  is the spatially annual average SWE over the land region above 45° N,  $N$  is the year, and  $n$  is all the image elements in the land region above 45° N.

To avoid confusion, we changed the "annual average SWE" on Lines 278-279 to "spatially distributed annual average SWE". In Lines 306-308, "annual average SWE" was modified to "region-wide annual average SWE".

7.Lines 467-468 (Fig. 1): Some data stations (RSSD) are located in the open Norwegian Sea, and transect of stations in Canada is odd. Are these observations from some campaign?

**Reply: This suggestion has been accepted, and Figure 1 has been modified accordingly.**

We double-checked the station locations in the RSSD dataset and found that observational sites do exist on some of the islands in the Norwegian Sea, so the locations of the stations in Figure 1 are reasonable. According to your suggestion, we have switched to using “hemispheric-scale snow course observational data”, so the issue of the “transect of stations” in the Canadian region has been resolved.

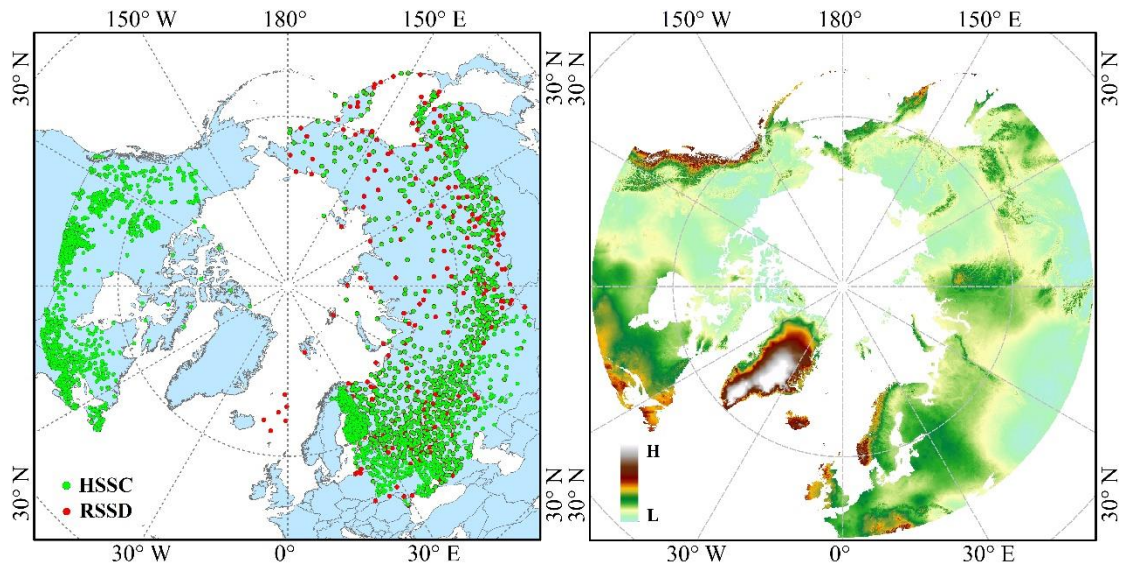

**Figure 1: The DEM and snow survey stations of the research region. The right subgraph shows the DEM and the left subgraph shows the SWE observational stations. HSSC, hemispheric-scale snow course; RSSD, the Russian snow survey station. The spatial range of the RRM SWE product is consistent with that of DEM).**

8.Lines 508-510: The wide spread of range is y-axis is odd.

Reply: Thank you for your suggestion, and Figure 8 has been modified accordingly.

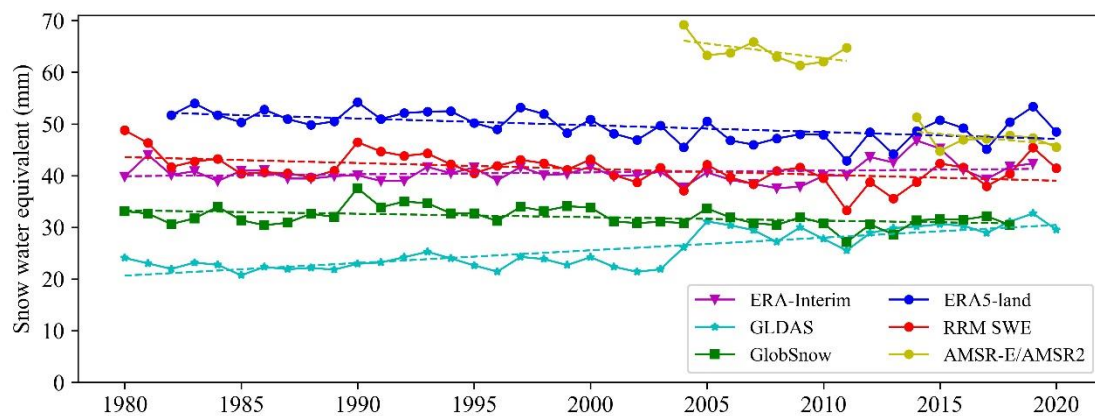

**Figure 8: Annual variation tendency in the AMSR-E/AMSR2 SWE, ERA-Interim SWE, GLDAS SWE, GlobSnow SWE, ERA5-land SWE and RRM SWE products from 1979 to 2019 (the dotted line is the trend line calculated based on the Mann-Kendall method).**

9.References:

Pulliainen, J., Luojus, K., Derksen, C., et al. Patterns and trends of Northern Hemisphere snow mass from 1980 to 2018, *Nature*, 581: 294-298, 2020.

Reply: Thank you for providing this reference, which we have cited in the manuscript. We studied the reference carefully and discussed it in detail in the manuscript.
